# Supplementary material
Source: publisher figshare collection journal article supplement (https://karger.figshare.com/ndownloader/files/24144194)
Supplement: Supplementary file 1 [file 24144194]

**Supplemental Table 1.** Patient demographics, perinatal factors and disease presentation in infants with SIP requiring Penrose drain only compared to infants with SIP that underwent exploratory laparotomy.

| *Parameter* | *SIP (drain only)*  *n = 14* | *SIP (laparotomy)*  *n = 34* | *p-value* |
| --- | --- | --- | --- |
| ***Demographic characteristics:*** |  |  |  |
| Birth weight, g | 763 [640-840] | 792 [640-956] | 0.56 |
| Gestational age, weeks | 25.2 [24.7-26.9] | 26.0 [25.0-27.0] | 0.52 |
| Males, *n* (%) | 10 (66.7) | 20 (60.6) | 0.52 |
| Race, *n* (%)  White  Black  Hispanic  Asian  Other | 1 (7.1)  2 (14.3)  10 (71.5)  0  1 (7.1) | 4 (11.8)  4 (11.8)  22 (64.6)  2 (5.9)  2 (5.9) | 1.0 |
| Maternal age, yrs (mean ± SD), (*n=14 / 33)*1 | 29.1 ± 7.0 | 27.9 ± 6.3 | 0.61 |
| ***Prenatal and intrapartum factors:*** |  |  |  |
| Intrauterine growth restriction, *n* (%) | 0 | 3 (8.8) | 0.55 |
| Chorioamnionitis, *n* (%) | 4 (28.6) | 4 (11.8) | 0.21 |
| Antenatal steroids, *n* (%) (*n=14 / 32)*1 | 11 (78.6) | 27 (84.4) | 0.68 |
| C-section, *n* (%) | 9 (64.3) | 26 (76.5) | 0.48 |
| Apgar score (*n=13 / 33)*1 |  |  |  |
| 1 min  5 min | 4 [3-6]  7 [6-8] | 5 [2-6]  7 [5-8] | 0.86  0.84 |
| ***Therapeutic factors:*** |  |  |  |
| Steroids, *n* (%) | 0 | 13 (38.2) | **0.01** |
| NSAIDs, *n* (%) | 8 (57.1) | 27 (79.4) | 0.16 |
| ***Disease presentation:*** |  |  |  |
| DOL on admission | 7 [4-9] | 8 [6-10] | 0.085 |
| PMA on admission | 26.3 [25.7-27.6] | 27.3 [26-28.4] | 0.17 |
| Admission weight, g | 763 [670-900] | 828 [700-1,040] | 0.24 |
| Abdominal wall discoloration, *n* (%) | 8 (57.1) | 21 (61.8) | 1.0 |
| Alkaline Phosphatase, Units/L (*n=15 / 32)*1 | 635 [508-1,161] | 893 [585-1,408] | 0.17 |
| White Blood Cell count, 103/microL | 19.8 [13.6-29.7] | 14.2 [8.7-23.7] | 0.091 |
| pH, ( mean ± SD) | 7.30 ± 0.11 | 7.30 ± 0.1 | 0.75 |
| Creatinine, mg/dL | 0.81 [0.73-0.87] | 0.83 [0.7-1.0] | 0.86 |

1 Missing values present

Continuous variables reported as Median [IQR], unless specified otherwise
